# Supplementary material for: Reverse optogenetics of G protein signaling by zebrafish non-visual opsin Opn7b for synchronization of neuronal networks
Source: PubMed Central journal article supplement (PMC8302595; doi:10.1038/s41467-021-24718-0), 2021-07-23
Supplement: 41467_2021_24718_MOESM2_ESM.pdf [file 41467_2021_24718_MOESM2_ESM.pdf]

**Editorial Note:** This manuscript has been previously reviewed at another journal that is not operating a transparent peer review scheme. The manuscript was considered suitable for publication without further review at *Nature Communications*.
